# Supplementary material for: Preparation of nanoliposomes loaded with anthocyanins from grape skin extracts: stability, gastric absorption and antiproliferative properties
Source: Royal Society of Chemistry journal article supplement (doi:10.1039/d2fo02008d), 2022-01-01
Supplement: d2fo02008d1.pdf [file d2fo02008d1.pdf]

## Supplementary materials

# Preparation of nanoliposomes loaded with anthocyanins from grape skin extracts: Stability, gastric absorption and antiproliferative properties

Rui Zhang<sup>1,2</sup>, Qian Zhang<sup>2,3</sup>, Hélder Oliveira<sup>4</sup>, Nuno Mateus<sup>4</sup>, Shuxin Ye<sup>5</sup>, Sijia Jiang<sup>5</sup>,  
Jingren He<sup>1,2\*</sup> and Muci Wu<sup>1,2\*</sup>

<sup>1</sup>National R&D Center for Se-rich Agricultural Products Processing, Hubei Engineering Research Center for Deep Processing of Green Se-rich Agricultural Products, School of Modern Industry for Selenium Science and Engineering, Wuhan Polytechnic University, Wuhan 430023, P. R. China;

<sup>2</sup>Key Laboratory for Deep Processing of Major Grain and Oil, Ministry of Education, Hubei Key Laboratory for Processing and Transformation of Agricultural Products, Wuhan Polytechnic University, Wuhan 430023, P. R. China;

<sup>3</sup>Xiangyang Academy of Agricultural Sciences, Hubei Province 441004, P.R. China;

<sup>4</sup>LAQV, REQUIMTE, Departamento de Química e Bioquímica, Faculdade de Ciências, Universidade do Porto, Ruado Campo Alegre s/n, 4169-007 Porto, Portugal;

<sup>5</sup>Yun-Hong Group Co. Ltd, Hubei Province 430206, P. R. China.

\*Corresponding Author Address:

Prof. Jingren He

Wuhan Polytechnic University, No.36 Huanhu Middle Road, Jinyinhu District, Wuhan 430023, P. R. China;

E-mail address: [jingren.he@whpu.edu.cn](mailto:jingren.he@whpu.edu.cn);

Dr. Muci Wu

Wuhan Polytechnic University, No.36 Huanhu Middle Road, Jinyinhu District, Wuhan 430023, P. R. China;

E-mail address: [muciwu@whpu.edu.cn](mailto:muciwu@whpu.edu.cn)

Figures

a)

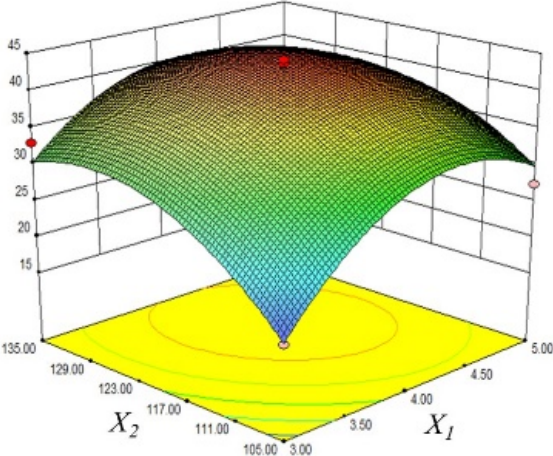

b)

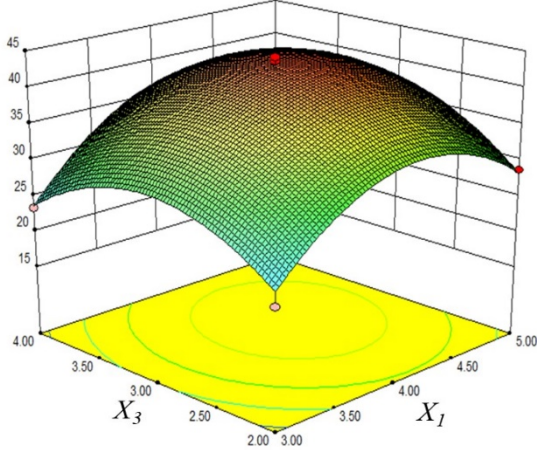

c)

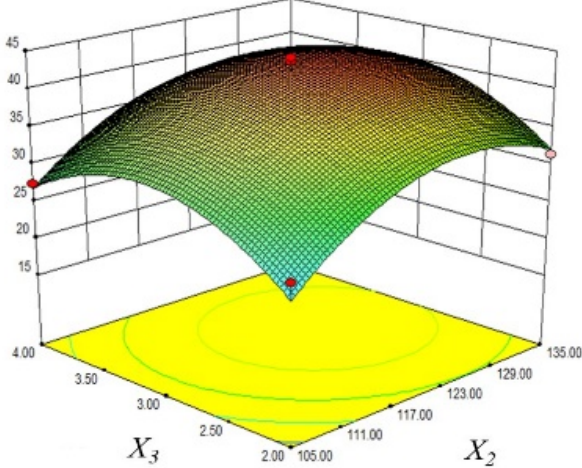

**Fig. S1.** Response surface plots of the effects of interaction terms ( $X_1$ : soy lecithin/cholesterol,  $X_2$ : ultrasonic power,  $X_3$ : ultrasonic time) on encapsulation efficiency (EE) of the anthocyanins nanoliposomes (ANLs):  $X_1$  and  $X_2$  (a);  $X_1$  and  $X_3$  (b);  $X_2$  and  $X_3$  (c).

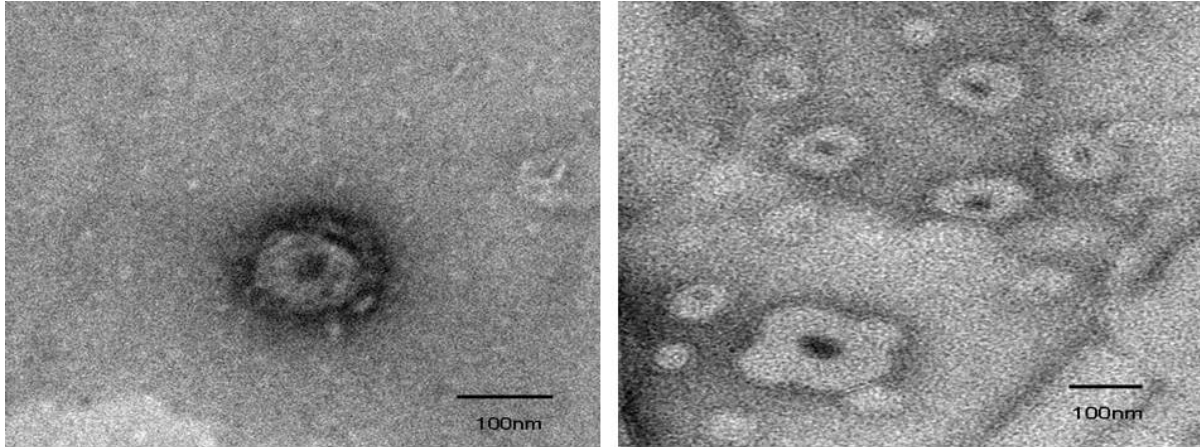

**Fig. S2.** Transmission electron microscope (TEM) images of anthocyanins nanoliposomes (ANLs).

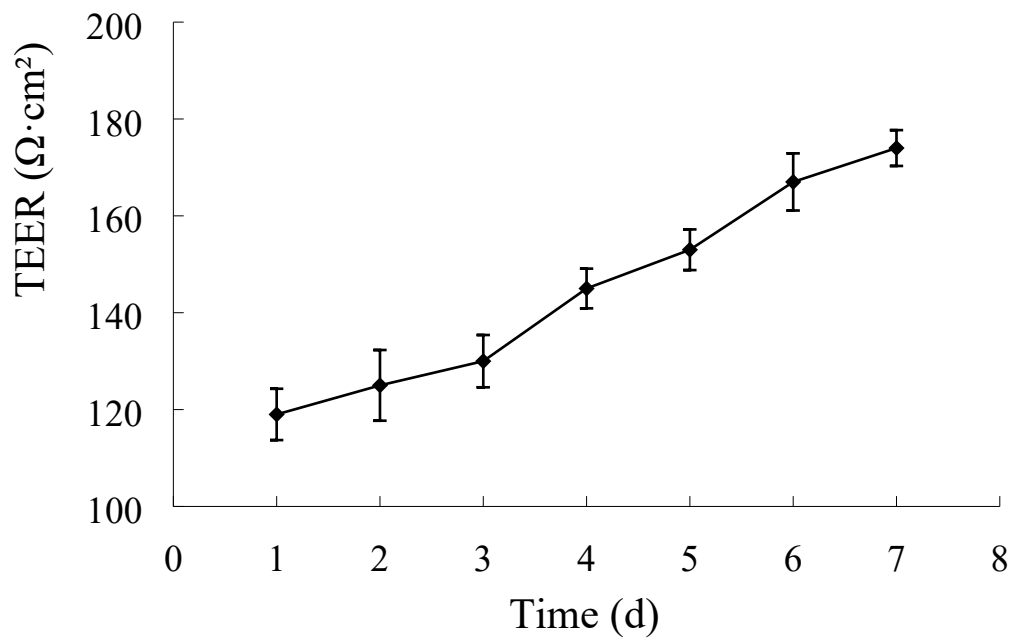

**Fig. S3.** TEER measurements of the MKN-28 cell monolayer during 7 days of culture time.

## Tables

**Table S1**

Variables of Box-Behnken design.

| Independent Variables          | Code Levels |     |     |     |
|--------------------------------|-------------|-----|-----|-----|
|                                | Symbol      | -1  | 0   | 1   |
| Soy lecithin/Cholesterol (w/w) | $X_1$       | 3   | 4   | 5   |
| Ultrasonic power (W)           | $X_2$       | 105 | 120 | 135 |
| Ultrasonic time (min)          | $X_3$       | 2   | 3   | 4   |

**Table S2**

Experimental data under different operation conditions for the formation of anthocyanins nolioposomes (ANLs) based on Box-Behnken design for response surface analysis.

| No. | Variable levels |       |       | Responses |
|-----|-----------------|-------|-------|-----------|
|     | $X_1$           | $X_2$ | $X_3$ | Y, EE (%) |
| 1   | 0               | 0     | 0     | 43.6      |
| 2   | 0               | 1     | -1    | 31.5      |
| 3   | -1              | 0     | 1     | 23.3      |
| 4   | 0               | -1    | -1    | 25.7      |
| 5   | -1              | 0     | -1    | 21.5      |
| 6   | -1              | -1    | 0     | 17.5      |
| 7   | 1               | -1    | 0     | 27.3      |
| 8   | -1              | 1     | 0     | 33.0      |
| 9   | 1               | 0     | 1     | 35.8      |
| 10  | 1               | 0     | -1    | 28.7      |
| 11  | 0               | 1     | 1     | 32.3      |
| 12  | 0               | 0     | 0     | 41.6      |
| 13  | 0               | -1    | 1     | 27.5      |
| 14  | 0               | 0     | 0     | 40.9      |
| 15  | 0               | 0     | 0     | 44.1      |
| 16  | 1               | 1     | 0     | 33.7      |
| 17  | 0               | 0     | 0     | 41.9      |

$X_1$ ,  $X_2$ ,  $X_3$  represent soy lecithin/cholesterol (w/w), ultrasonic power (W), and ultrasonic time (min), respectively; Y represents anthocyanins encapsulation efficiency (%).

**Table S3**

Analysis of variance and second-order polynomial equation obtained from the responses.

| Variable    | SS             | DF | MS     | F-value | P-value* |
|-------------|----------------|----|--------|---------|----------|
| Model       | 1017.11        | 9  | 113.01 | 20.30   | 0.0003** |
| $X_1$       | 114.01         | 1  | 114.01 | 20.48   | 0.0027** |
| $X_2$       | 132.03         | 1  | 132.03 | 23.72   | 0.0018** |
| $X_3$       | 16.53          | 1  | 16.53  | 2.97    | 0.1285   |
| $X_1 X_2$   | 20.70          | 1  | 20.70  | 3.72    | 0.0951   |
| $X_1 X_3$   | 7.02           | 1  | 7.02   | 1.26    | 0.2984   |
| $X_2 X_3$   | 0.25           | 1  | 0.25   | 0.045   | 0.8382   |
| $X_1^2$     | 285.54         | 1  | 285.54 | 51.29   | 0.0002** |
| $X_2^2$     | 167.65         | 1  | 167.65 | 30.11   | 0.0009** |
| $X_3^2$     | 198.15         | 1  | 198.15 | 35.59   | 0.0006** |
| Residual    | 38.97          | 7  | 5.57   |         |          |
| Lack of fit | 31.50          | 3  | 10.50  | 5.62    | 0.0643   |
| Pure error  | 7.47           | 4  | 1.87   |         |          |
| Cor Total   | 1056.08        | 16 |        |         |          |
|             | $R^2$          |    |        | 0.9631  |          |
|             | Adjusted $R^2$ |    |        | 0.9300  |          |
|             | C.V.%          |    |        | 7.29    |          |

$X_1$ : soy lecithin/cholesterol (w/w),  $X_2$ : ultrasonic power (W),  $X_3$ : ultrasonic time (min); SS: sum of squares; DF: degree of freedom; MS: mean square; C.V.%: coefficient of variation.

(\*\*) highly significant,  $P \leq 0.01$ ; (\*) significant,  $P \leq 0.05$ ; not significant,  $P > 0.05$ .
